# Supplementary material for: Obesity/Type II Diabetes Promotes Function-limiting Changes in Murine Tendons that are not reversed by Restoring Normal Metabolic Function
Source: PubMed Central journal article supplement (PMC6003963; doi:10.1038/s41598-018-27634-4), 2018-06-15

## **Supplementary Information**

### **Obesity/ Type II Diabetes Promotes Function-limiting Changes in Murine Tendons that are not reversed by Restoring Normal Metabolic Function**

Valentina Studentsova, Keshia M. Mora, Melissa F. Glasner,  
Mark R. Buckley, Alayna E. Loiselle

Full unedited gels for Figure 4

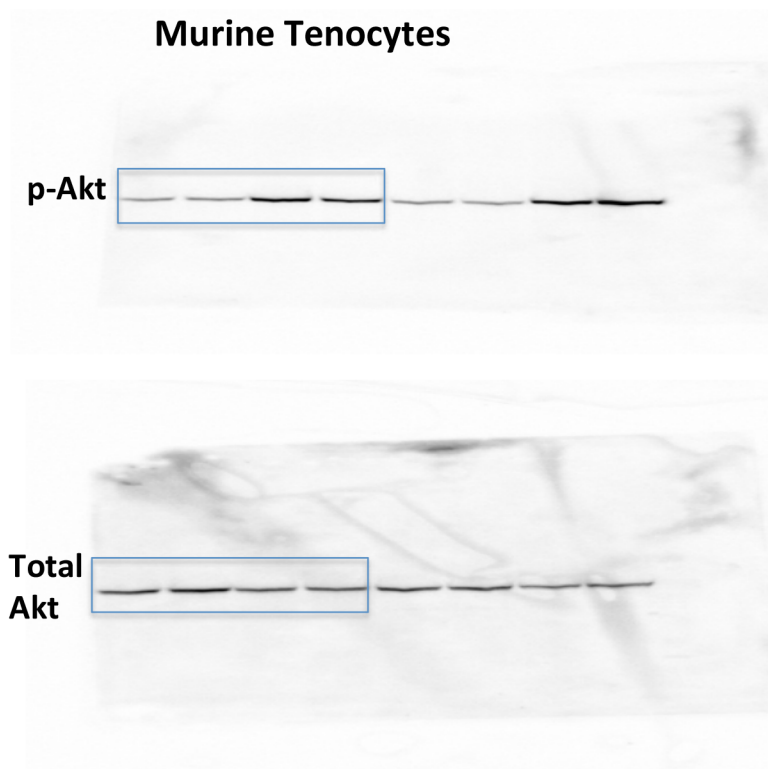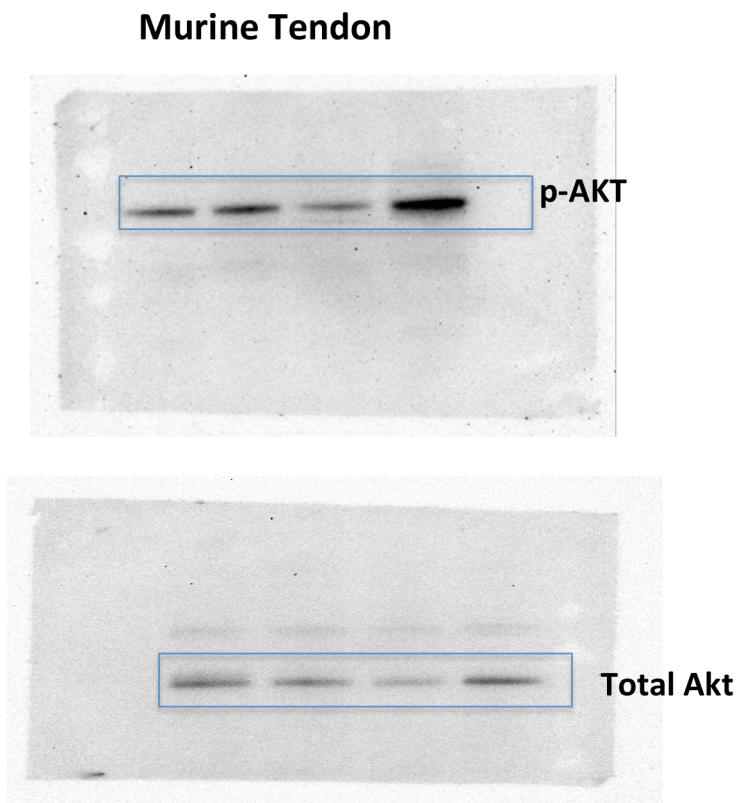

Full unedited gels for Figure 5

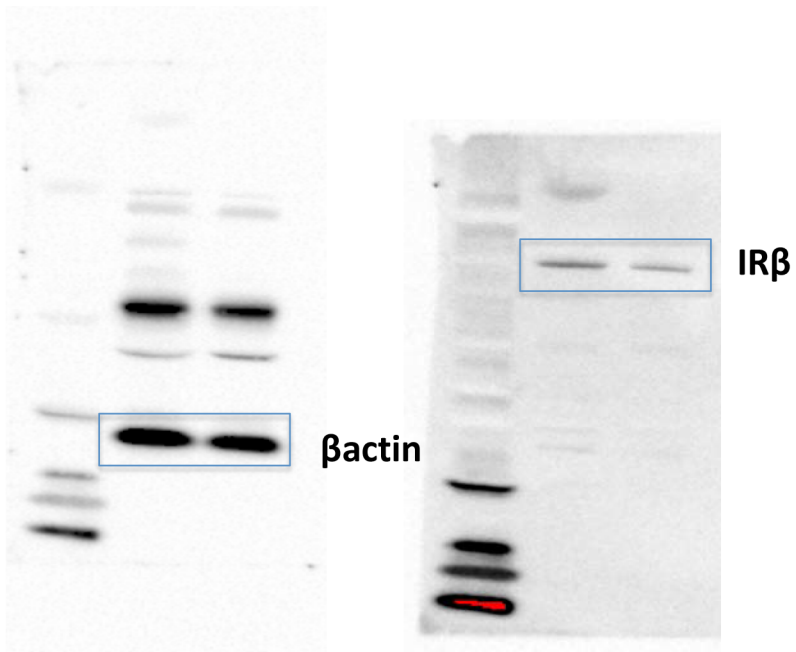

Supplement: 41598_2018_27634_MOESM1_ESM.pdf [file 41598_2018_27634_MOESM1_ESM.pdf]
